# Supplementary material for: An Artificial MnWO4 Cathode Electrolyte Interphase Enabling Enhanced Electrochemical Performance of δ-MnO2 Cathode for Aqueous Zinc Ion Battery
Source: MDPI journal article supplement (doi:10.3390/ma16083228), 2023-04-19
Supplement: s1 [file s1]

## Supporting Information

### An Artificial $\text{MnWO}_4$ Cathode Electrolyte Interphase Enabling Enhanced Electrochemical Performance of $\delta\text{-MnO}_2$ Cathode for Aqueous Zinc Ion Battery

Hao Tian, Huanlin Zhang, You Zuo, Lei Ling, Tengfei Meng, Hang Zhang, Xiaohong Sun and Shu Cai \*

Key Laboratory of Advanced Ceramics and Machining Technology of Ministry of Education, School of Materials Science and Engineering, Tianjin University, Tianjin 300072, China

\* Correspondence: caishu@tju.edu.cn.

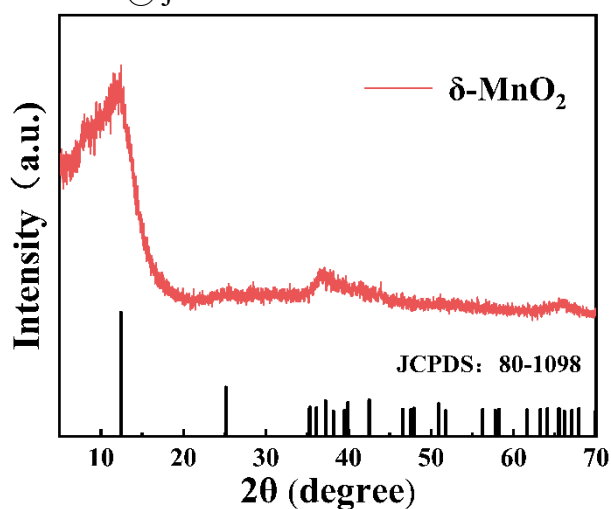

Figure S1 XRD pattern of synthetic  $\delta\text{-MnO}_2$  pristine powder.

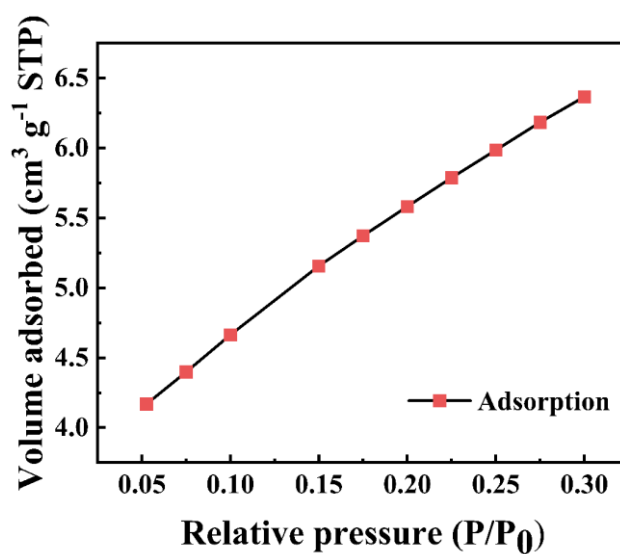

Figure S2  $\text{N}_2$  adsorption isotherm of  $\delta\text{-MnO}_2$

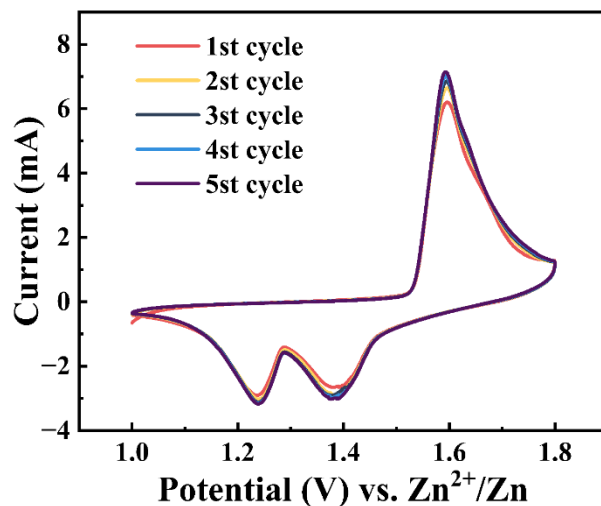

**Figure S3** CV curves of the  $\delta$ -MnO<sub>2</sub> electrode at 1 mV/s.

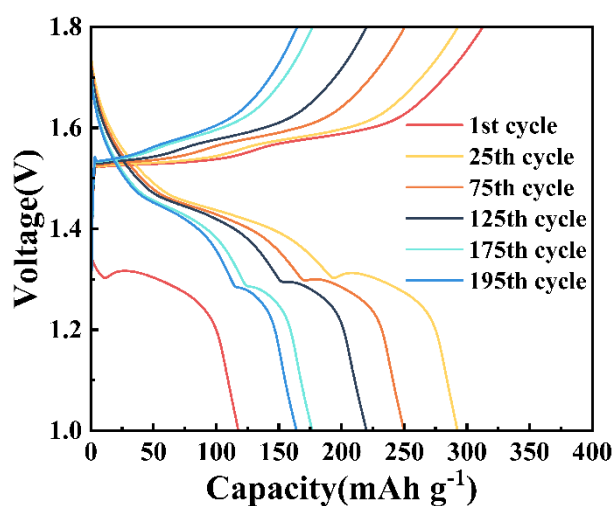

**Figure S4** Galvanostatic charge and discharge curves of the  $\delta$ -MnO<sub>2</sub> cathode at 0.2 A g<sup>-1</sup>.

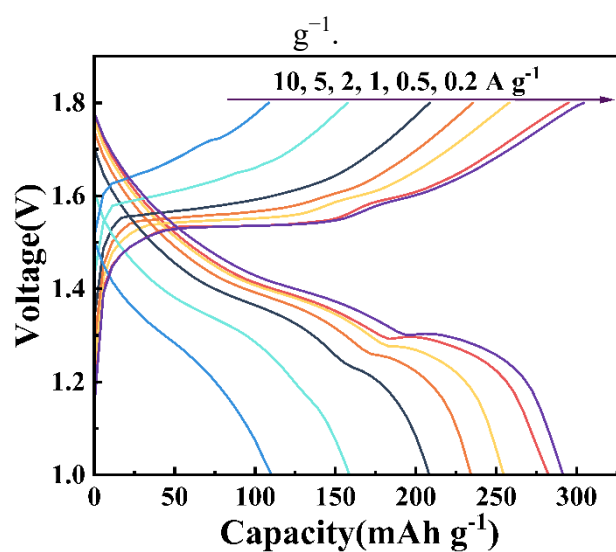

**Figure S5** Galvanostatic charge and discharge curves of W-MnO<sub>2</sub> cathode at various current densities ranging from 0.2 A g<sup>-1</sup> to 10 A g<sup>-1</sup>.

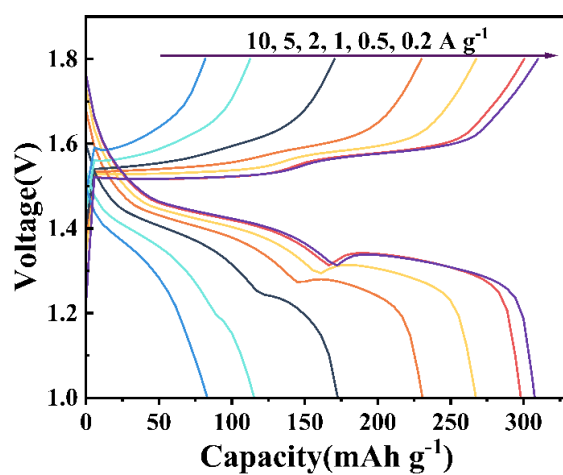

**Figure S6** Galvanostatic charge and discharge curves of the  $\delta$ -MnO<sub>2</sub> cathode at various current densities ranging from 0.2 A g<sup>-1</sup> to 10 A g<sup>-1</sup>.

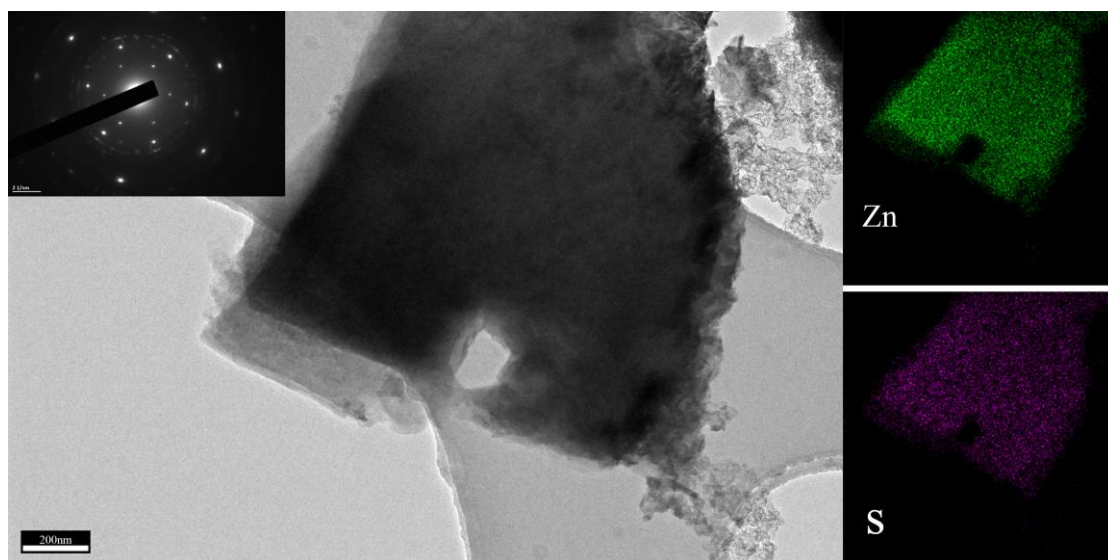

**Figure S7** High-angle annular bright-field scanning TEM (HAABF-STEM) image

and the corresponding elemental mappings, respectively.

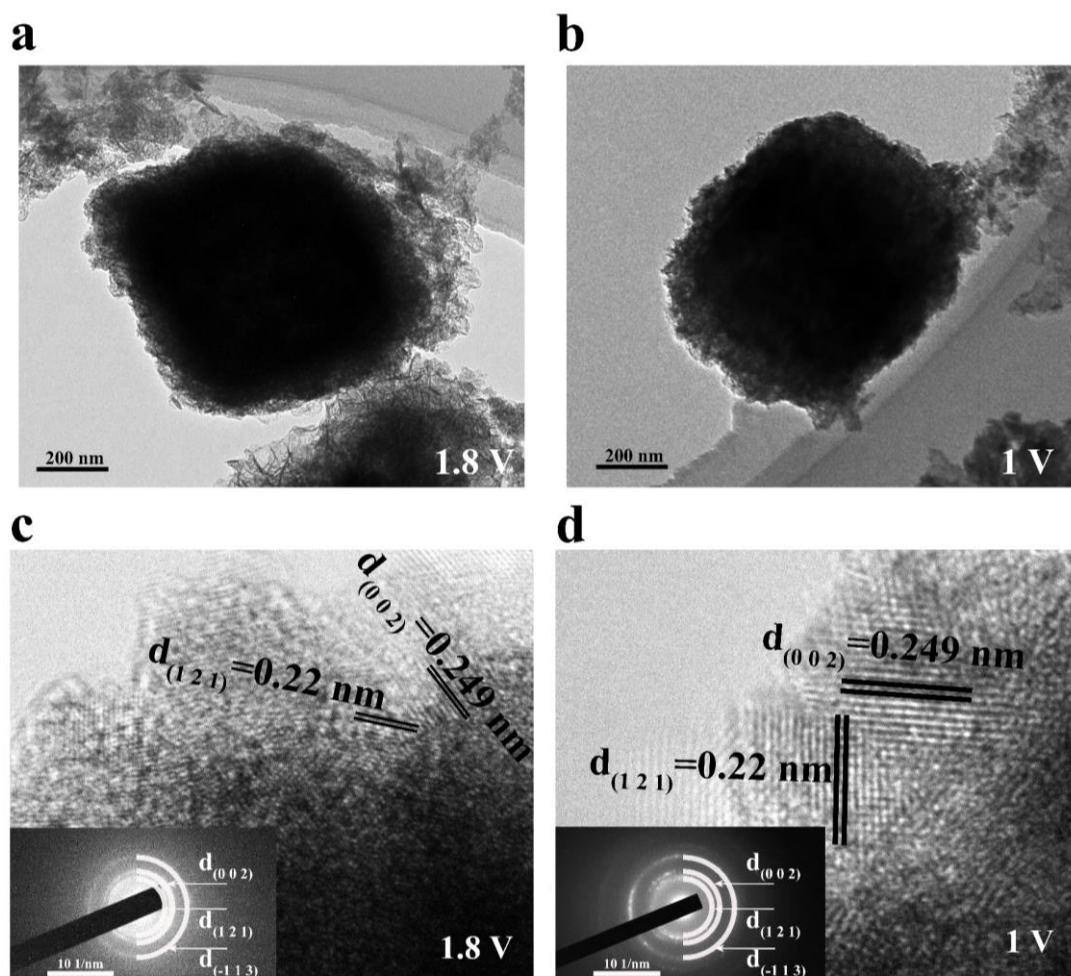

**Figure S8** (a, b) TEM、HR-TEM and SAED pattern of W-MnO<sub>2</sub>: (a,c) charged (1.8 V). (b,d) discharged (1 V).

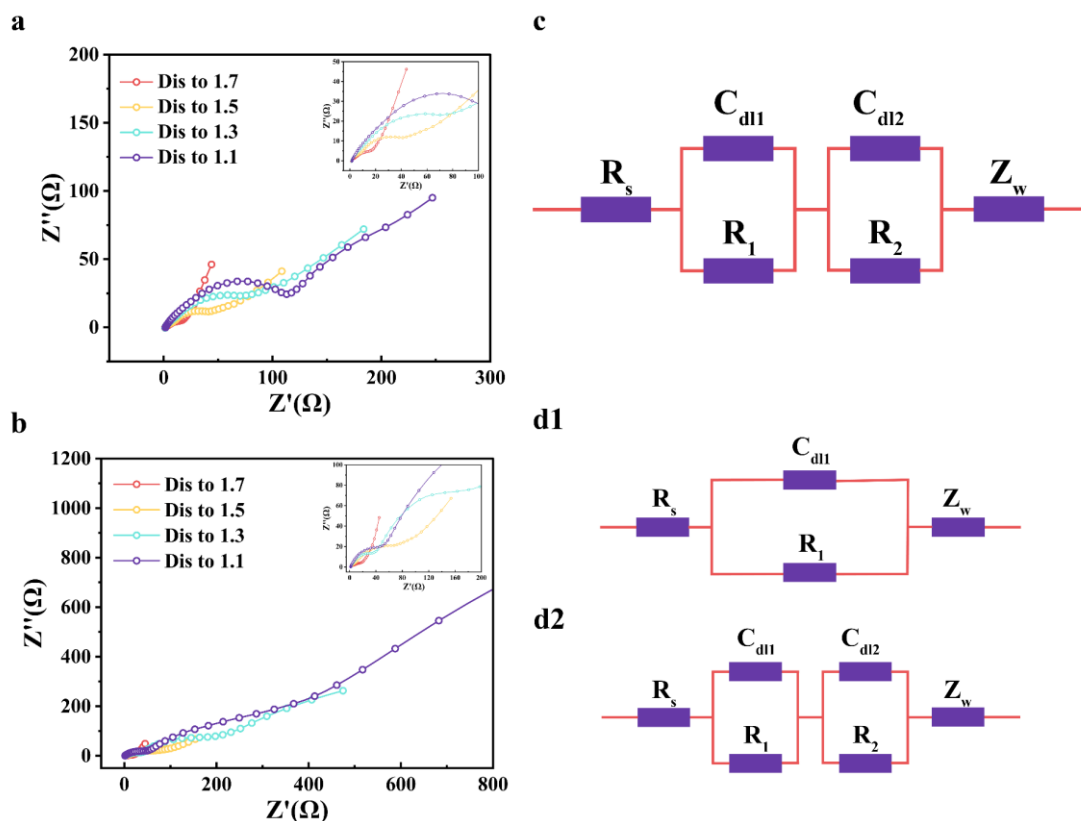

**Figure S9** EIS of a) the W-MnO<sub>2</sub> and b)  $\delta$ -MnO<sub>2</sub> cathodes at different stages during the discharge process. The equivalent circuit model for c) the W-MnO<sub>2</sub> and d) the  $\delta$ -MnO<sub>2</sub> electrode.

The EIS data have fitted the data with the equivalent circuit, which is composed of two semicircles in the high and low-frequency regions, respectively. For  $\delta$ -MnO<sub>2</sub> cathode, the EIS data show that the initial composition of one semicircle changes to two semicircles during the discharge process, which is attributed to the gradual production of basic zinc sulfate. The equivalent circuit of  $\delta$ -MnO<sub>2</sub> at 1.7 V is shown in Figure S8d1. The equivalent circuit of  $\delta$ -MnO<sub>2</sub> after 1.7 V is shown in Figure S8d2.

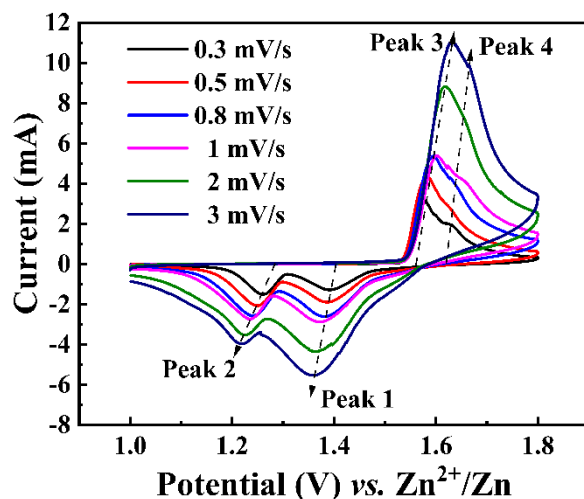

**Figure S10** CV tests for  $\delta$ -MnO<sub>2</sub> cathode at various scan rates ranging from 0.3 to 3 mV/s.

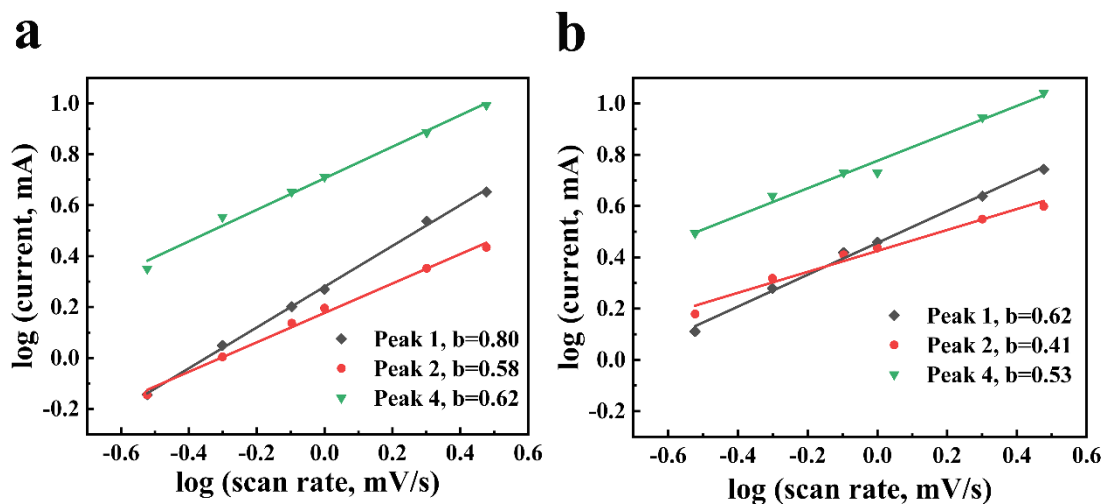

**Figure S11** (a, b)  $b$  values of different peaks in CV curves for W-MnO<sub>2</sub> and  $\delta$ -MnO<sub>2</sub> cathodes: (a) W-MnO<sub>2</sub>. (b)  $\delta$ -MnO<sub>2</sub>.

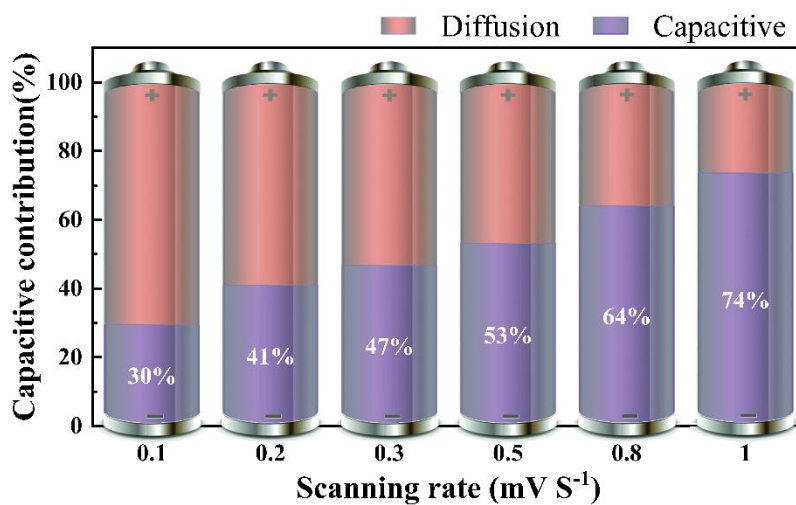

**Figure S12** The proportion of capacitive and diffusion contributions at various scan

rates for  $\delta$ -MnO<sub>2</sub>.

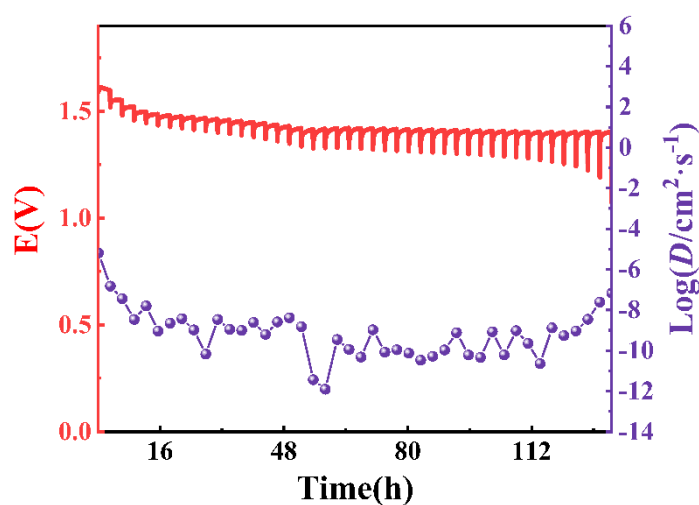

**Figure S13** GITT test of the  $\delta$ -MnO<sub>2</sub> cathode.

**Table 1** Comparison of cycling performance with other recent studies

| Electrode                                                                              | Current density       | Cycles | Capacity retention |
|----------------------------------------------------------------------------------------|-----------------------|--------|--------------------|
| Ca <sub>2</sub> MnO <sub>4</sub> [1]                                                   | 0.1 A g <sup>-1</sup> | 1000   | 80%                |
| Ba <sub>0.26</sub> V <sub>2</sub> O <sub>5</sub> ·0.92H <sub>2</sub> O [2]             | 5 A g <sup>-1</sup>   | 2000   | 87%                |
| MnO <sub>2</sub> [3]                                                                   | 3 A g <sup>-1</sup>   | 3000   | 94%                |
| Zn <sub>3</sub> V <sub>2</sub> O <sub>7</sub> (OH) <sub>2</sub> ·2H <sub>2</sub> O [4] | 0.1 A g <sup>-1</sup> | 100    | 90%                |
| MnO@C [5]                                                                              | 2 A g <sup>-1</sup>   | 10000  | 70%                |
| MnO <sub>2</sub> [6]                                                                   | 0.5 A g <sup>-1</sup> | 1000   | 82%                |
| Na <sub>2</sub> V <sub>6</sub> O <sub>16</sub> ·3H <sub>2</sub> O [7]                  | 5 A g <sup>-1</sup>   | 5000   | 85%                |
| $\delta$ -MnO <sub>2</sub> (This work)                                                 | 10 A g <sup>-1</sup>  | 2000   | 98.2%              |

## References

- Guo, S.; Liang, S.; Zhang, B.; Fang, G.; Ma, D.; Zhou, J. Cathode interfacial layer formation via in situ electrochemically charging in aqueous zinc-ion battery. *Acs Nano* **2019**, *13*, 13456-13464, doi:10.1021/acsnano.9b07042.
- Luo, S.; Cao, X.; Su, Q.; Zhang, Y.; Liu, S.; Xie, X.; Liang, S.; Pan, A. Layered barium vanadate cathodes for aqueous zinc batteries: enhancing cycling stability through inhibition of vanadium dissolution. *Acs Appl Energ Mater* **2021**, *4*, 6197-6204, doi:10.1021/acsaem.1c00979.
- Wu, B.; Zhang, G.; Yan, M.; Xiong, T.; He, P.; He, L.; Xu, X.; Mai, L. Graphene scroll-coated  $\alpha$ -MnO<sub>2</sub> nanowires as high-performance cathode materials for aqueous Zn-ion battery. *Small* **2018**, *14*, 1703850, doi:10.1002/sml.201703850.
- Guo, J.; Ming, J.; Lei, Y.; Zhang, W.; Xia, C.; Cui, Y.; Alshareef, H.N. Artificial solid electrolyte interphase for suppressing surface reactions and cathode dissolution in aqueous zinc ion batteries. *Acs Energy Lett* **2019**, *4*, 2776-2781, doi:10.1021/acsenerylett.9b02029.

5. Li, S.; Yu, D.; Liu, L.; Yao, S.; Wang, X.; Jin, X.; Zhang, D.; Du, F. In-situ electrochemical induced artificial solid electrolyte interphase for MnO@C nanocomposite enabling long-lived aqueous zinc-ion batteries. *Chem Eng J* **2022**, 430, 132673, doi:10.1016/j.cej.2021.132673.
6. Liu, Y.; Zhi, J.; Hoang, T.K.A.; Zhou, M.; Han, M.; Wu, Y.; Shi, Q.; Xing, R.; Chen, P. Paraffin Based cathode-electrolyte interface for highly reversible aqueous zinc-ion battery. *Acs Appl Energ Mater* **2022**, 5, 4840-4849, doi:10.1021/acsaem.2c00252.
7. Zhang, L.; Zhang, B.; Hu, J.; Liu, J.; Miao, L.; Jiang, J. An in situ artificial cathode electrolyte interphase strategy for suppressing cathode dissolution in aqueous zinc ion batteries. *Small Methods* **2021**, 5, 2100094, doi:10.1002/smtd.202100094.
